# Supplementary material for: The topology of higher-order complexes associated with brain hubs in human connectomes
Source: PubMed Central journal article supplement (PMC7560876; doi:10.1038/s41598-020-74392-3), 2020-10-14
Supplement: 41598_2020_74392_MOESM1_ESM.pdf [file 41598_2020_74392_MOESM1_ESM.pdf]

---

**Supplementary Information for**  
***The topology of higher-order complexes associated with brain hubs in human connectomes***

Miroslav Andjelković<sup>a,c</sup>, Bosiljka Tadić<sup>a,b</sup>, Roderick Melnik<sup>d,e</sup>

<sup>a</sup>*Department of Theoretical Physics, Jožef Stefan Institute, Jamova 39, Ljubljana, Slovenia*

<sup>b</sup>*Complexity Science Hub, Josefstaedter Strasse 39, Vienna, Austria*

<sup>c</sup>*Department of Thermal Engineering and Energy, Vinča Institute of Nuclear Sciences -  
National Institute of the Republic of Serbia, University of Belgrade, 11000 Belgrade, Serbia*

<sup>d</sup>*MS2Discovery Interdisciplinary Research Institute, M2NeT Laboratory and Department of Mathematics Wilfrid Laurier University,  
Waterloo, ON, Canada;* <sup>e</sup>*BCAM - Basque Center for Applied Mathematics, Alameda de Mazarredo 14, E-48009 Bilbao, Spain*

**Contents**

Figure SI-1: High-resolution image of the female con-

sensus connectome at 1000000 tracked fibres with 1015  
labelled brain regions, weighted edges, and colour-coded  
communities:

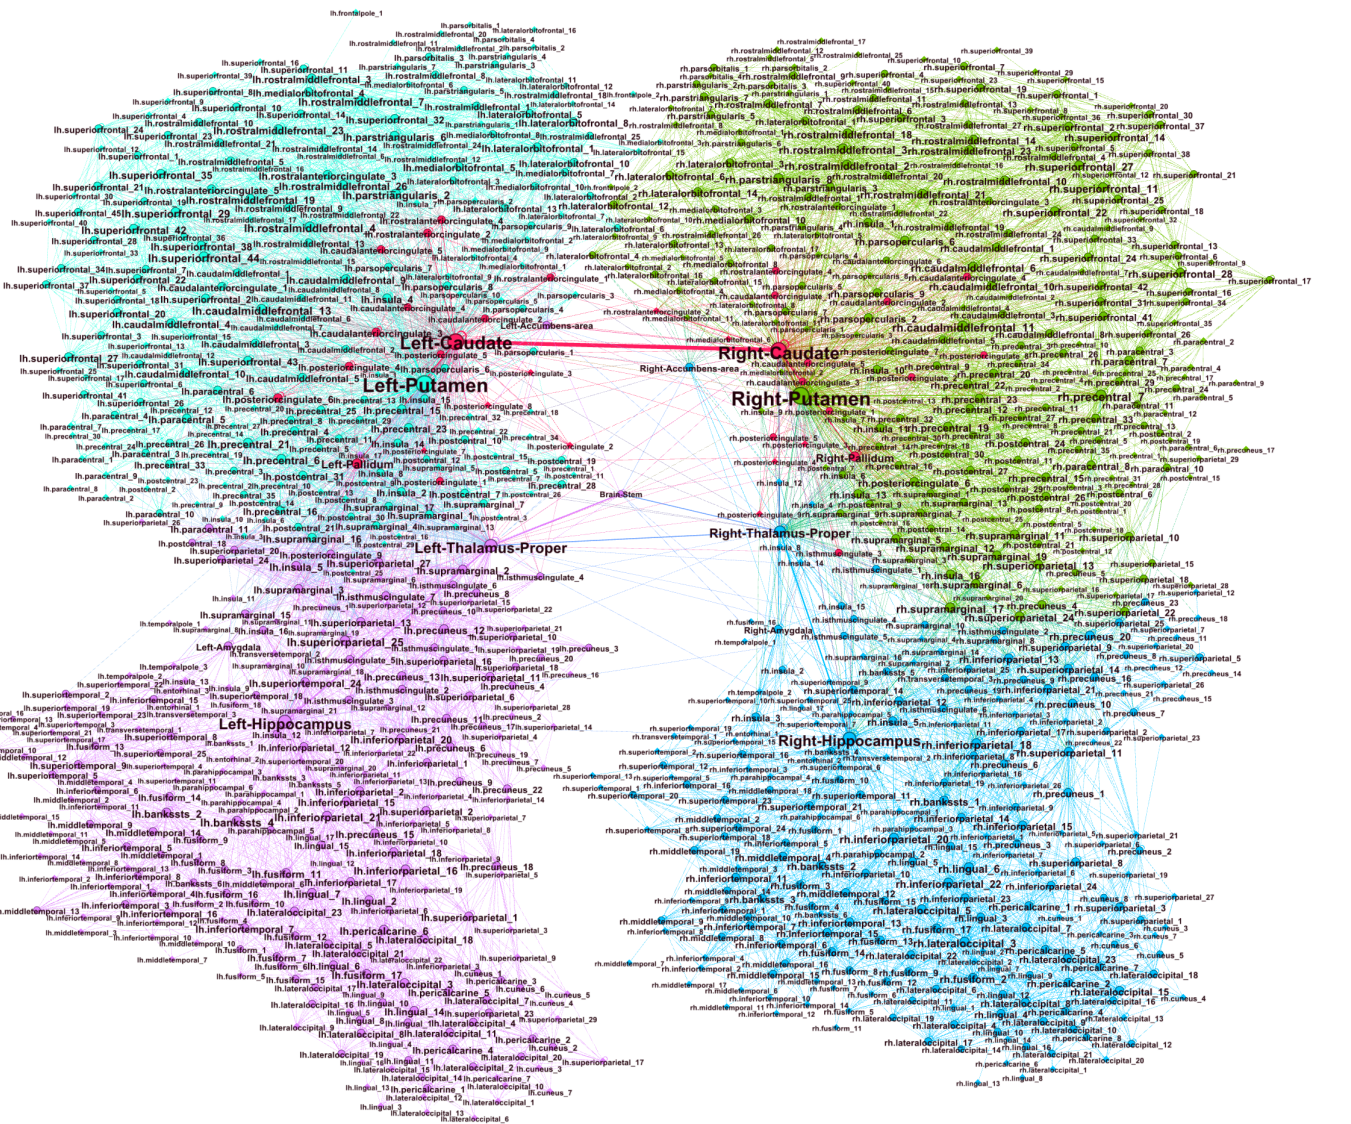

FIG. SI-1:
